# Supplementary material for: Mitochondrial Bioenergetics in Placenta of Crossbred Cattle- Deciphering the Association of Mitochondrial Alterations with Retained Placenta
Source: Preprints.org preprint supplement (doi:10.20944/preprints202405.0256.v1), 2024-05-06
Supplement: Supplementary file 1 [file supplementary]

| **Genes** | **Primer sequences (5**'**-3**'**)** | |
| --- | --- | --- |
| **Forward primer** | **Reverse Primer** |
| ***B2M***  ***Cyt B***  ***ND1***  ***ND2***  ***ND3***  ***ND4L***  ***ND4***  ***ND5***  ***ND6***  ***COX1***  ***COX2***  ***COX3***  ***ATP6***  ***ATP8***  ***Cyt B***  **12s** | CAGCGTACTCCAAAGATTCA CATCCGACACAACAACAGCA  GGATCCTTCACCCTCTCCACA  CCCAATCATCTTTTTTATTATTCTATC  TCAGAAAAAACAAGCCCATATGAG  GATCCCACCTAATATCCTCC  GGCCTCACATCCTCTATAC  GGCGACATCGGGTTTATC  CCAGTAACAAACGCCCCTAAG  CCCGACATAGCATTCCCCC  TACTACACTCATGGGCCG  GAGTGTACGGCTCAACTTTC  TCGGAGGAGCTACACTTG  CACAACTAGACACATCAACATGAC  CAAATCCTCACCGGCCTA  GGTCAACGAAACTAAGAGGAG | GAATGCTCCACTTTTTCAAT ATAAGCCTCGTCCTACGTGC GTTCTGATTCTCCTTCGGTGA  GCCCGTGGGTTGTGATT  GTGGAAGGAGGAGTGCAATTTCT  CTGCGAAGACCAGTAAGATG  AGGGCTAGGTTGGTTAGG  TCCTGTTGCGGCTAGTA  ATTGTGTTAAATTTTGGTGGGTC  AGGTTACCTGCTAAAGGGG  ATTCAAGGACAATAGGTATAAAG  GCCGAAATGGTGGTTAGAG  GCTGACTAGGAGGGTGAATA  CAAATAAATTTTCGTTCATTTTGTTTCTC  CTCGTCCTACGTGTATATATAAG  GGCTGGCACGAGATTTAC |

**Table S1** Genes and primer pairs used for mtDNA copy number and mitochondrial protein coding gene expression analysis

**B2M Amplification curves:**


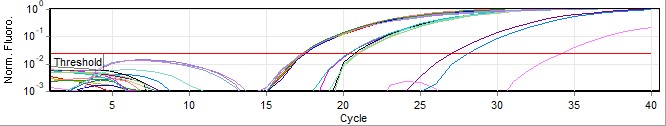


**B2M Met Curve:**


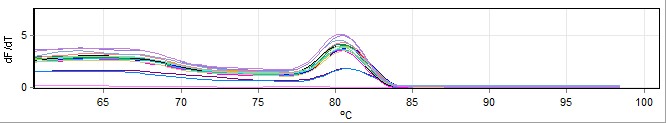


**Cyt B Amplification Curve:**


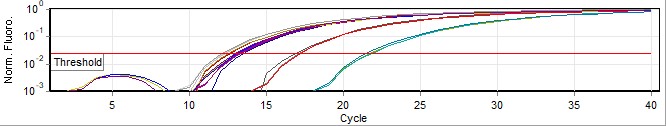


**Cyt B Melt Curve:**


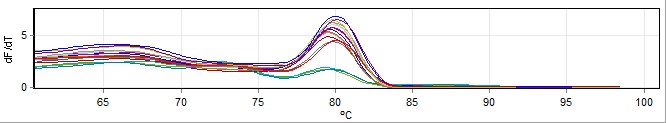


## **Figure S1:** Amplification plots and Melt Curve of Different Analysed Genesfor mt-DNA copy number analysis


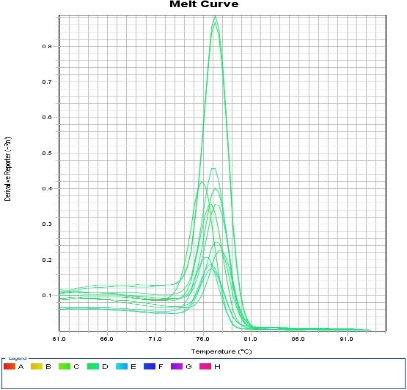

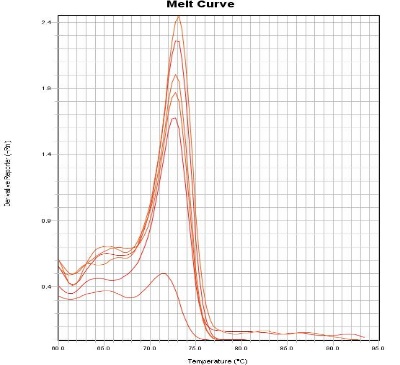

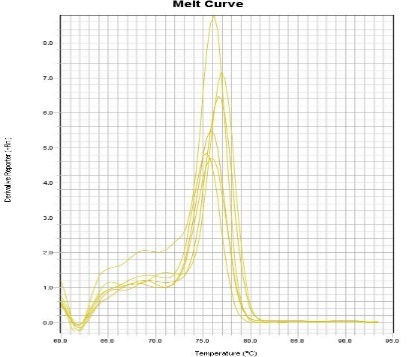

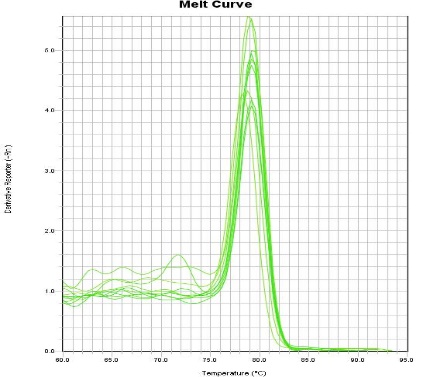


***ND4***

***ND3***

***ND2***

***ND1***


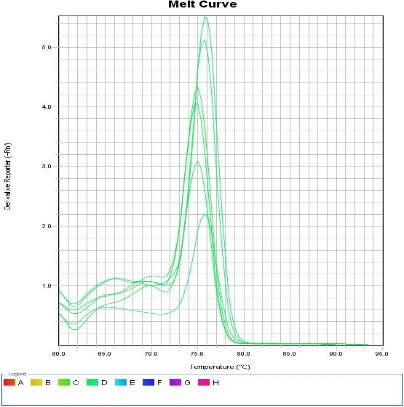

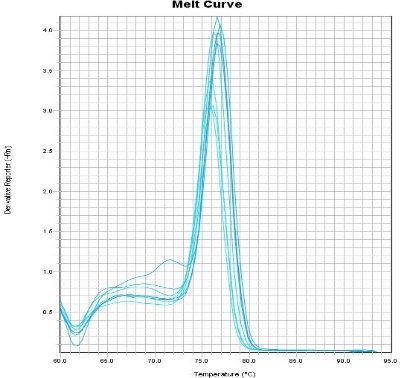

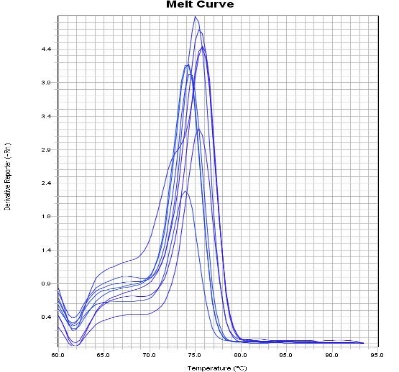

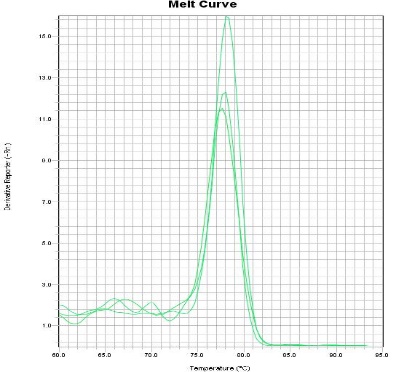


***Cyt B***

***ND6***

***ND5***

***ND4L***


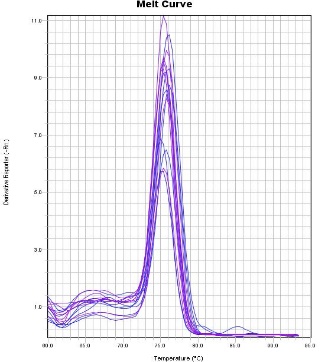

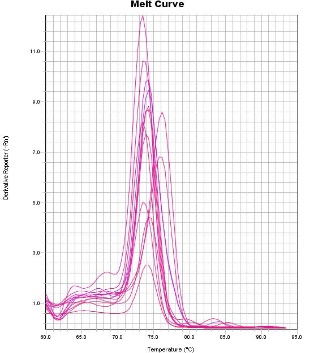

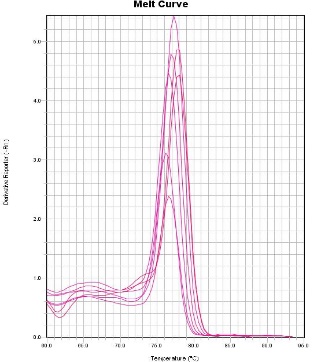

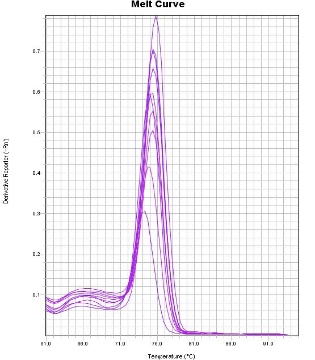

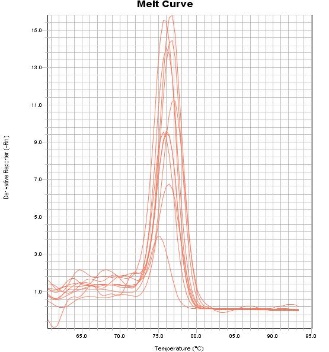


***ATP8***

***ATP6***

***COX3***

***COX2***

***COX1***

## **Figure S2:** Melt Curve of 13 mitochondrial protein coding genes for relative gene expression analysis.
